# Supplementary material
Source: publisher site journal article supplement (https://www.dovepress.com/article/542572)
Supplement: Supplementary file 1 [file Supplementary%20appendix.docx]

**Supplementary Appendix 1A** Questionnaires for patients Set A

Demographic

- Age
- Gender:
  - Male
  - Female
- Marital status:
  - Married
  - Single
  - Other
- Education level:
  - Primary or below
  - Secondary
  - Tertiary: non-degree course (Including diploma / certificate / sub-degree course)
  - Tertiary: degree course (including bachelor’s degree / postgraduate course)
- Average monthly income:
  - Under $10,000
  - $10,000-$19,999
  - $20,000-$29,999
  - $30,000-$39,999
  - $40,000 or above
- Do you smoke?:
  - Yes
  - No
- Do you have any chronic diseases?:
  - Yes
  - No
- What is your reason for admission?:
  - Surgical
  - Medical treatment
  - Oncology (nonsurgical)
  - Palliative care
- Do you have a history of venous thromboembolism (VTE)?:
  - Personal
  - Family
  - None
- Are you receiving thromboprophylaxis?:
  - Yes
    - Pharmacological (e.g. LMWH, UFH, NOAC)
    - Non-pharmacological (e.g. elastic compression stockings, intermittent pneumatic compression)
  - No
  - I don’t know
- Do you have a history of thromboprophylaxis?:
  - Yes
  - No
  - I don’t know

VTE Awareness (correct answer highlighted in **bold**)

- Do you know what is deep venous thrombosis (DVT)?:
  - **Yes**
  - No
- Which of the following causes DVT?:
  - Blood clot in vein
  - Lack of oxygen in vein
  - A tumour in vein
  - Not sure
- What are the signs and symptoms of DVT?:
  - **Swelling in one leg**
  - Itching of leg
  - **Pain/tenderness in one leg**
  - **Redness and warmth in one leg**
  - Leg paralysis
  - Fever
  - Swelling in both legs
  - Don’t know
- What are the most common complications of DVT?:
  - **PE**
  - **Death**
  - **Recurrent DVT**
  - **Post thrombotic syndrome**
  - Not sure
- Do you know what is pulmonary embolism (PE)?:
  - **Yes**
  - No
- “PE occurs when pulmonary arteries are occluded, most often by clots”

Is the above statement true?:

- **Yes**
- No
- What are the signs and symptoms of PE?:
  - **Difficulty breathing**
  - **Fast breathing**
  - Slow shallow breathing
  - **Chest pain that worsens when taking a deep breath**
  - Rapid heart rate
  - **Light-headedness**
  - Pain radiating to arm
  - **Coughing blood**
  - Frequent headaches
  - Don't know
- What are the most common complications of PE?:
  - **Death**
  - **Pulmonary hypertension**
  - Pleural effusion
  - Not sure
- “Presence of comorbid diseases (DM, HTN, MI, stroke, HF) increase the risk of developing VTE”

Is the above statement true?:

- **Yes**
- No
- Not sure
- What are the most common risk factors of developing VTE?:
  - **Hospital stay**
  - **Surgery**
  - **Cancer**
  - **Not moving for long time**
  - **Pregnancy/giving birth**
  - **Using estrogen based meds**
  - **Family history of blood clots**
  - **Age older than 65**
  - Too much exercise
  - **High blood cholesterol**
  - Donating blood
  - **High blood pressure**
  - **Obesity**
  - Varicose veins
  - **Smoking**
  - **Recent stroke**
  - **Trauma**
  - **Long flight**
  - Not sure
- Do we need to worry about blood clots and consider it as a medical emergency?:
  - **Yes**
  - No
- Can most blood clots be prevented?:
  - **Yes**
  - No
- “Blood clots in the legs which have not been treated will pass into the lung”

Is the above statement true?:

- **Yes**
- No
- “Blood clots can cause death”

Is the above statement true?:

- **Yes**
- No

VTE Thromboprophylaxis (correct answer highlighted in bold)

Non-invasive

- How can VTE be prevented?:
  - Walking
  - **Stretching legs**
  - **Drinking plenty of fluids**
  - Eating lots of fibre
  - Bed rest
  - Washing/bathing regularly
  - **Wearing compression stocking**
  - **Using compression devices.**
  - **Taking blood thinners**
  - I don’t know

Thromboprophylaxis satisfaction (Likert-scale of 5)

- Thromboprophylaxis is safe and effective
- I am in favour of receiving injections
- Side effects of thromboprophylaxis are tolerable
- Time of receiving injections is acceptable
- Reasons for injections are adequately explained
- I am satisfied with the information given on DVT/PE

**Questionnaire Set A (Chi Version) for patients**

**背景資料**

- **年齡**
- **性別**
  - **男**
  - **女**
- **婚姻狀況**
  - **已婚**
  - **單身**
  - **其他**
- **教育程度**
  - **小學或以下**
  - **中學**
  - **大專（包括基礎及高級文憑/證書/副學士）**
  - **大學（包括學士文憑 / 研究生）**
- **平均月入**
  - **$10,000 以下**
  - **$10,000-$19,999**
  - **$20,000-$29,999**
  - **$30,000-$39,999**
  - **$40,000 or above**
- **請問你有吸煙的習慣嗎？**
  - **有**
  - **無**
- **請問你有長期病患嗎？**
  - **有**
  - **無**
- **請問你為何住院？**
  - **外科手術**
  - **內科治療**
  - **癌症治療（非手術）**
  - **紓緩護理**
- **請問你或家人有靜脈栓塞的病史嗎？**
  - **個人**
  - **家人**
  - **無**
- **請問你現在有進行​​血栓預防嗎？**
  - **有**
    - **藥物（例如：低分子量肝素 LMWH、傳統肝素 UFH、非維他命K拮抗劑類口服抗凝血劑 NOAC）**
    - **非藥物（例如：壓力襪、間歇性氣動加壓治療）**
  - **無**
  - **不知道**
- **請問你有​​血栓預防的經驗嗎？**
  - **有**
  - **無**
  - **不知道**

**靜脈栓塞**

- **請問你知道什麼是深部靜脈血栓嗎？**
  - **知道**
  - **不知道**
- **請問以下哪個原因會導致深部靜脈血栓？**
  - **靜脈血栓**
  - **靜脈缺氧**
  - **靜脈腫瘤**
  - **不知道**
- **以下哪項是深部靜脈血栓的癥兆和症狀？**
  - **左腿或右腿腫脹**
  - **腿部痕癢**
  - **左腿或右腿疼痛或壓痛**
  - **左腿或右腿發紅及發熱**
  - **腿部麻痹**
  - **發燒**
  - **雙腿腫脹**
  - **不知道**
- **以下哪項是深部靜脈血栓最常見的併發症？**
  - **肺栓塞**
  - **死亡**
  - **深部靜脈血栓復發**
  - **栓塞後症候群**
  - **不知道**
- **請問你知道什麼是肺栓塞嗎？**
  - **知道**
  - **不知道**
- **「當肺部動脈被部分地阻塞，肺栓塞便會發生，而通常都是因為血栓阻塞造成。」以上這句句子正確嗎？**
  - **正確**
  - **錯誤**
- **以下哪項是肺栓塞的癥兆和症狀？**
  - **呼吸困難**
  - **呼吸急促**
  - **慢而淺的呼吸**
  - **胸口疼痛，而且深呼吸時會更嚴重**
  - **心跳加速**
  - **頭暈**
  - **手臂疼痛**
  - **咳血**
  - **經常性頭痛**
  - **不知道**
- **以下哪項是肺栓塞最常見的併發症？**
  - **死亡**
  - **肺高壓**
  - **肋膜積水**
  - **不知道**
- **「共病症（糖尿病、高血壓、心臟病發、中風、心臟衰竭）會增加患上靜脈血栓的風險。」以上這句句子正確嗎？**
  - **正確**
  - **錯誤**
  - **不知道**
- **以下哪項是患上靜脈血栓的危險因子？**
  - **留院**
  - **手術**
  - **癌症**
  - **長時間沒有移動**
  - **懷孕/生育**
  - **服用雌激素有關的藥物**
  - **血栓的家庭病史**
  - **65歲或以上**
  - **過多運動**
  - **高膽固醇**
  - **捐血**
  - **高血壓**
  - **癡肥**
  - **靜脈曲張**
  - **吸煙**
  - **最近的中風**
  - **創傷**
  - **乘搭長途飛機**
  - **不知道**
- **請問血栓是一個令人擔心的緊急醫療狀況嗎？**
  - **是**
  - **否**
- **請問可以預防大部分的血栓嗎？**
  - **可以**
  - **不可以**
- **「如果血栓得不到適當的治療，它會進入肺部。」以上這句句子正確嗎？**
  - **正確**
  - **錯誤**
- **「血栓可以引致死亡。」以上這句句子正確嗎？**
  - **正確**
  - **錯誤**

**預防方法**

**非介入性**

- **請問可以怎樣預防靜脈血栓？**
  - **行路**
  - **伸展腿部**
  - **補充足夠水分**
  - **進食大量纖維**
  - **躺下休息睡覺**
  - **定時洗澡**
  - **間歇性氣動加壓治療**
  - **壓力襪**
  - **服用薄血藥**
  - **不知道**

**對血栓的預防藥物的滿意程度（以1至5評分）**

- **血栓預防是安全而且有效的**
- **我願意接受血栓的預防藥物的注射**
- **我能忍受血栓的預防藥物的副作用**
- **血栓的預防藥物的注射時間是可以接受的**
- **有關醫護人員對我解釋清楚為何需要血栓的預防藥物注射**
- **我對接收到的深部靜脈血栓和肺栓塞的資訊感到滿意**

**醫護人員**

**背景資料**

- **年齡**
- **性別**
  - **男**
  - **女**
- **教育程度**
  - **小學或以下**
  - **中學**
  - **大專（包括基礎及高級文憑/證書/副學士）**
  - **大學（包括學士文憑 / 研究生）**
- **現時專科**
  - **輪流？**
  - **外科**
  - **骨科**
  - **內科**
- **現時職位**
  - **健康服務助理**
  - **學生護士**
  - **登記護士**
  - **註冊護士**
  - **高級執業註冊護士**
  - **專科護士**
  - **護士顧問**

**靜脈血栓預防**

- **請臥床病人進行腿部運動能預防靜脈血栓**
  - **是**
  - **否**
- **定時協助臥床病人移動能預防靜脈血栓**
  - **是**
  - **否**
- **足夠水分能預防靜脈血栓**
  - **是**
  - **否**
- **控制血糖及血脂水平能預防靜脈血栓**
  - **是**
  - **否**
- **當情況許可時，盡快幫助醫院病人進行下床運動並不能預防靜脈血栓**
  - **是**
  - **否**
- **壓力襪能預防靜脈血栓**
  - **是**
  - **否**
- **大部分有靜脈血栓的病人都是有病徵的**
  - **是**
  - **否**
- **如果病人是臥床不起/癱瘓的、經歷長時間的手術、或有深部靜脈血栓或肺栓塞的病史，他應該接受靜脈血栓預防治療**
  - **是**
  - **否**
- **如果病人正服用傳統肝素UFH（5000 u BID）作預防，他需要在進行手術或入侵性醫療程序前停止療程**
  - **是**
  - **否**
- **多於30分鐘的全身麻醉會提高深部靜脈血栓的風險**
  - **是**
  - **否**
- **手術時，癡肥及老年病人有更高深部靜脈血栓的風險**
  - **是**
  - **否**
- **手術後的早期下床運動並不能預防深部靜脈血栓**
  - **是**
  - **否**
- **手術患者接受深部靜脈血栓預防措施的選擇取決於危險因素的數量**
  - **是**
  - **否**
- **以下哪項是深部靜脈血栓的主要危險因子？**
  - **多於6小時的大型手術**
  - **1個月內中風記錄**
  - **大型手術的病史**
  - **40至59歲**
  - **慢性阻塞性肺病**
  - **多處創傷**
  - **深部靜脈血栓的病史**
  - **不知道**
- **以下哪項可以預防深部靜脈血栓？**
  - **間歇性氣動加壓治療**
  - **壓力襪**
  - **踩單車腳踏**
  - **誘發性肺量計**
  - **抗凝血劑**
  - **安全背心**

**Supplementary Appendix 1B. Health Care Providers (SET B)**

Demographic

- Age
- Gender:
  - Male
  - Female
- Education level:
  - Primary or below
  - Secondary
  - Tertiary: non-degree course (Including diploma / certificate / sub-degree course)
  - Tertiary: degree course (including bachelor’s degree / postgraduate course)
- Current speciality
  - Rotational
  - Surgical
  - Orthopaedics
  - Medical
- Current position:
  - Healthcare Assistant
  - Student nurse
  - Enrolled nurse
  - Registered nurse
  - Advanced Practice Nurse
  - Nurse specialist
  - Nurse consultant

VTE prophylaxis awareness (answer highlighted in **bold**)

1. Instruct bedridden patients in lower limb exercises is helpful to prevent VTE.

- **Yes**
- No

1. Regularly moving bedridden patients is helpful for preventing VTE.

- **Yes**
- No

1. Adequate hydration can prevent the occurrence of VTE

- **Yes**
- No

1. Controlling blood glucose and blood lipids help to prevent VTE

- **Yes**
- No

1. Helping hospitalized patients to perform out-of bed activity as soon as their condition allows **does not** prevent VTE.

- Yes
- **No**

1. Elastic compression stockings may prevent DVT development

- **Yes**
- No

1. Most of hospitalized patients who develop DVT, are symptomatic

- **Yes**
- No

1. Patients with bed ridden/immobilized, prolonged surgery and previous DVT or PE should have DVT prophylaxis

- **Yes**
- No

1. In patient with prophylactic dose of unfractionated heparin (5000 u BID), do not need to stop it before surgery or invasive procedures(T)

- **Yes**
- No

1. General anesthesia more than 30 min has risk of DVT

- **Yes**
- No

1. Obese patient, and old age had more incidence of DVT during surgery

- **Yes**
- No

1. Early ambulation after surgery does not prevent DVT

- **Yes**
- No

1. Selection of DVT preventive measures for surgical patient determined by number of risk factor.

- **Yes**
- No

1. Which of the following are major risk factors for DVT development?

- **Major OT lasting >6 hours**
- **Stroke <1 month**
- History of major surgery
- Age 40-59
- COPD
- Multiple trauma
- History of VTE
- I do not know

1. Which of the following may prevent DVT development?

- **Intermittent pneumatic compression devices**
- **Gradual compression stocking**
- Exercise bike pedal
- Triflow incentive spirometer
- **Anticoagulation**
- Safety vest
